# Supplementary material for: High-fat diet-induced obesity impairs insulin signaling in lungs of allergen-challenged mice: Improvement by resveratrol
Source: PubMed Central journal article supplement (PMC5725490; doi:10.1038/s41598-017-17558-w), 2017-12-11

# **High-fat diet-induced obesity impairs insulin signaling in lungs of allergen-challenged mice: Improvement by resveratrol**

Diana M. André, Marina C. Calixto, Carolina Sollon, Eduardo C. Alexandre, Edith B. G. Tavares, Ana C. A. Naime, Gabriel F. Anhê & Edson Antunes

Department of Pharmacology, Faculty of Medical Sciences, University of Campinas (UNICAMP), Campinas, São Paulo, Brazil

**Supplementary Figure S1:** Length gels relative to Fig 1A, B and C. Red boxes indicate the cropping lines used to generate the figures.

A.

p- AKT

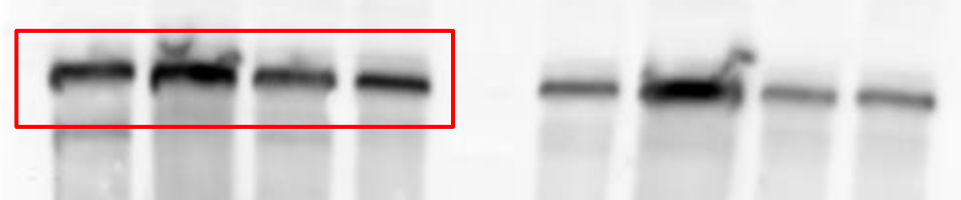

60kDa

$\beta$ -actin

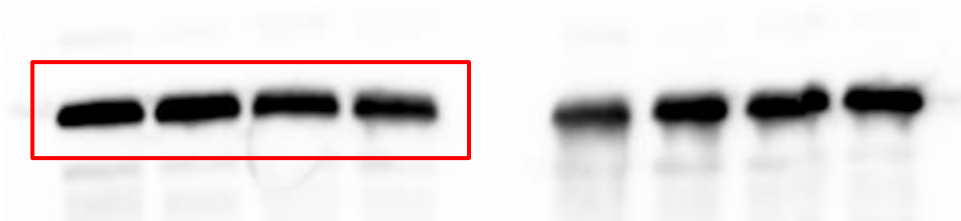

42kDa

# Supplementary Figure S1

B.

p- AKT

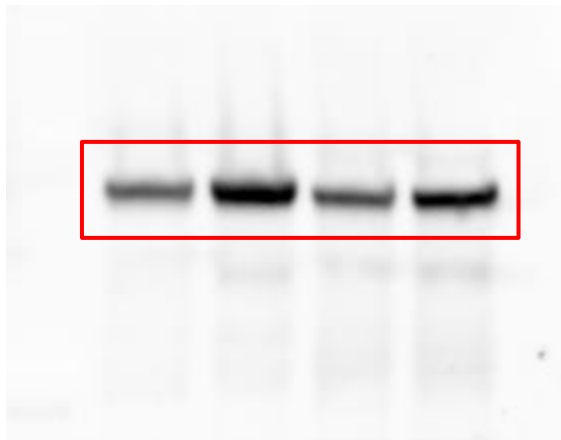

60kDa

$\beta$ -actin

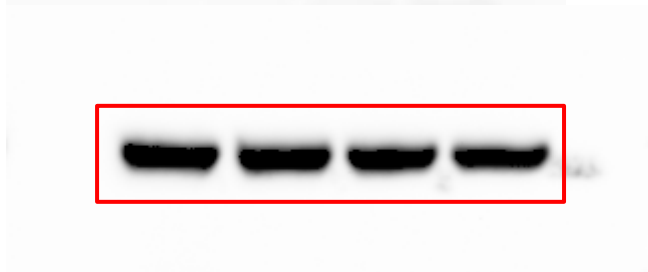

42kDa

# Supplementary Figure S1

C.

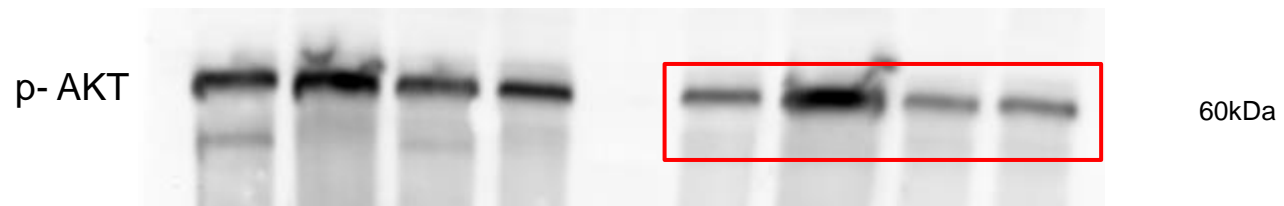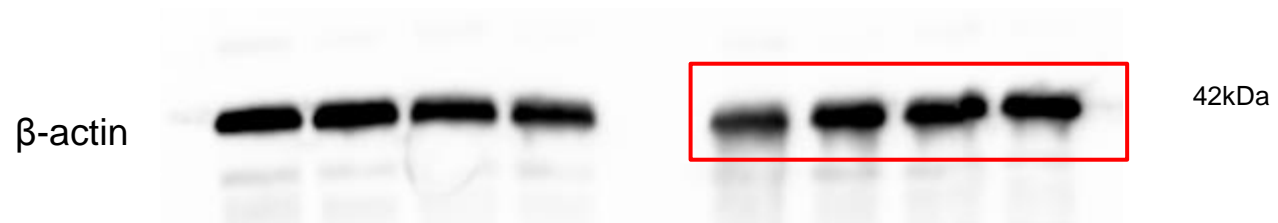

**Supplementary Figure S2:** Length gels relative to Fig 2A, B, C and D. Red boxes indicate the cropping lines used to generate the figures.

A.

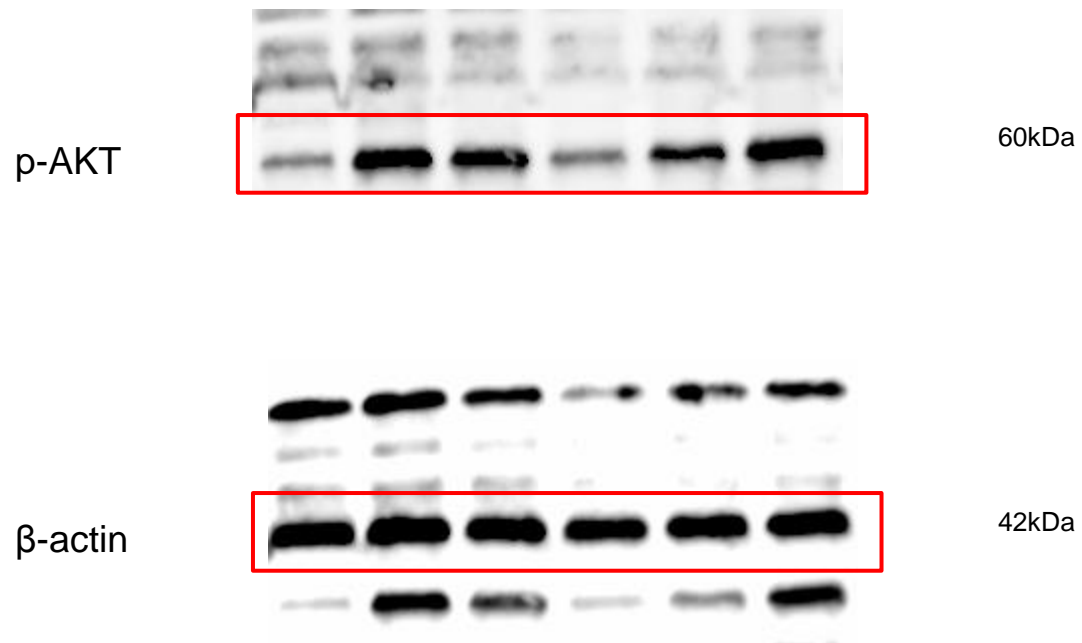

# Supplementary Figure S2

B.

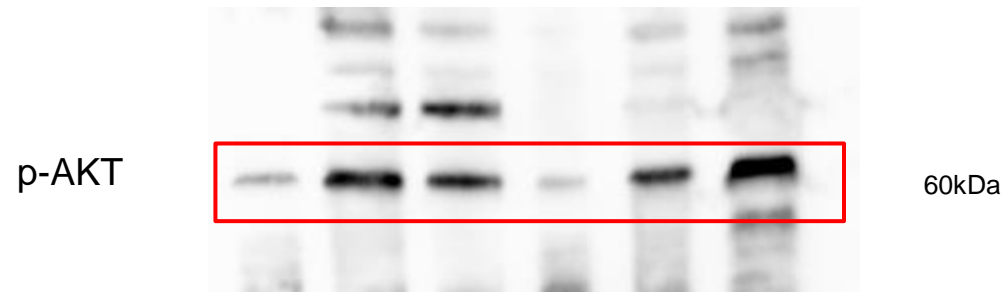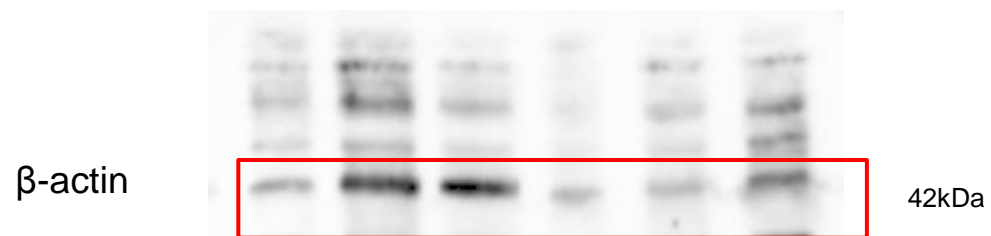

# Supplementary Figure S2

C.

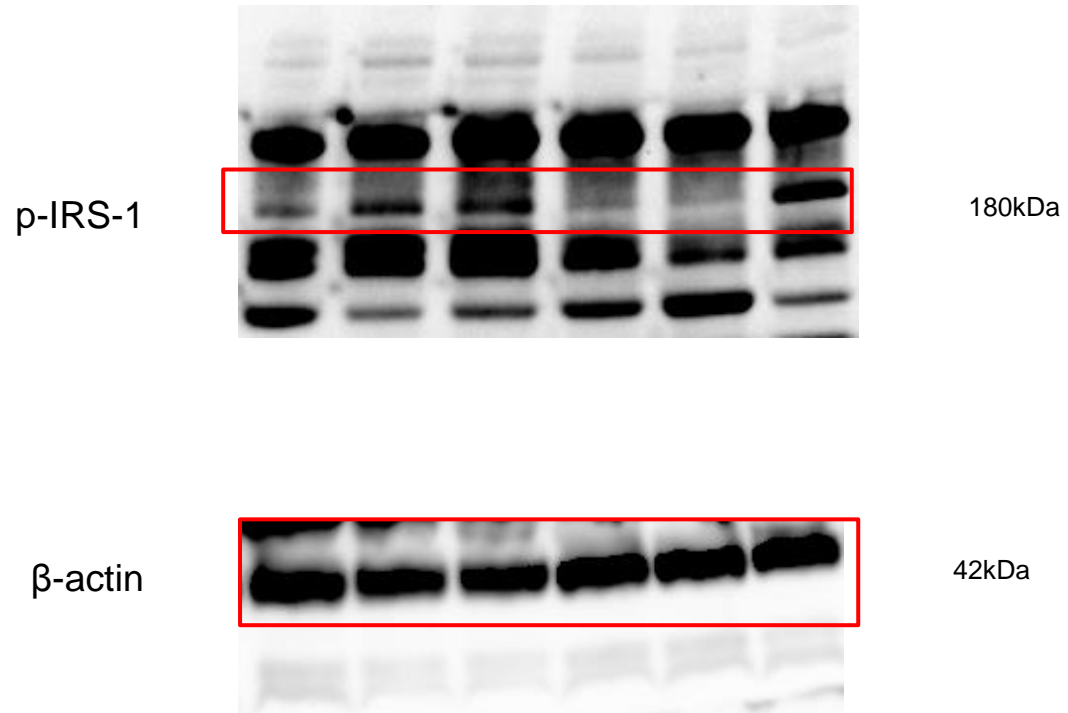

# Supplementary Figure S2

D.

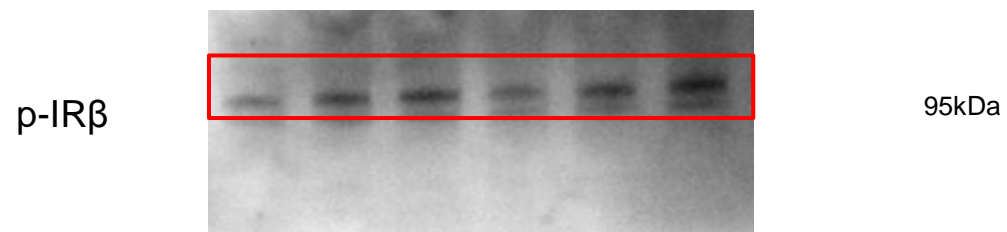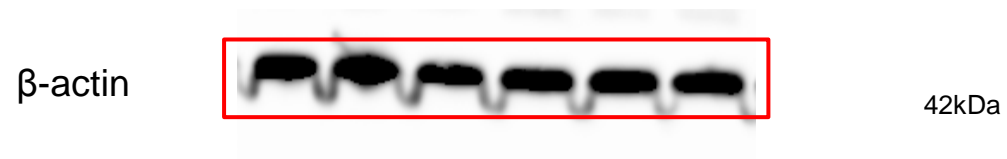



**Supplementary Figure S3:** Length gels relative to Fig 3A, B and C. Red boxes indicate the cropping lines used to generate the figures.

A.

IB: AKT

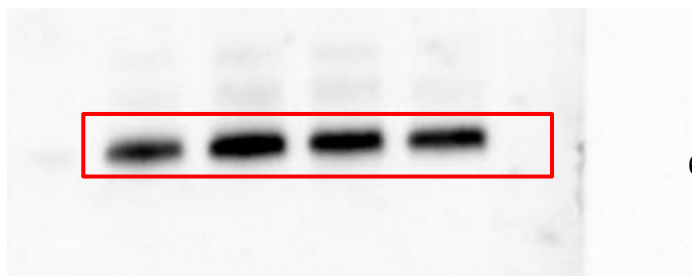

60kDa

IB: n-tyr

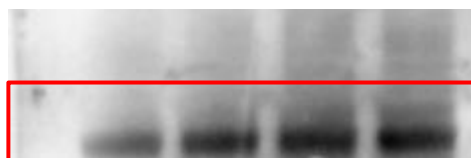

85kDa

# Supplementary Figure S3

B.

IB: IRS-1

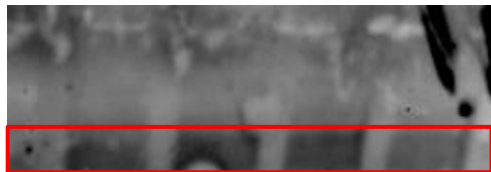

180kDa

IB: n-tyr

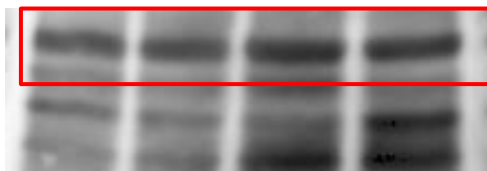

85kDa

# Supplementary Figure S3

C.

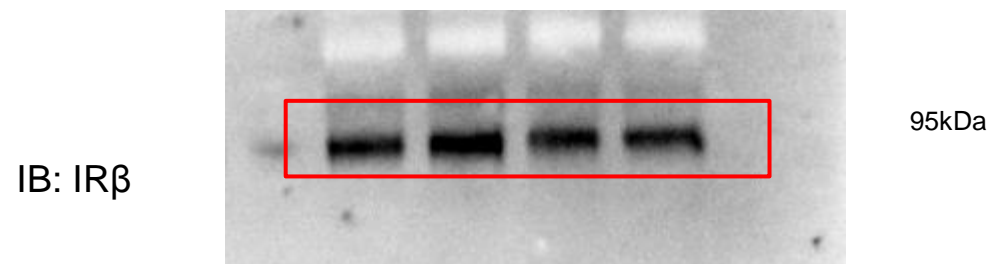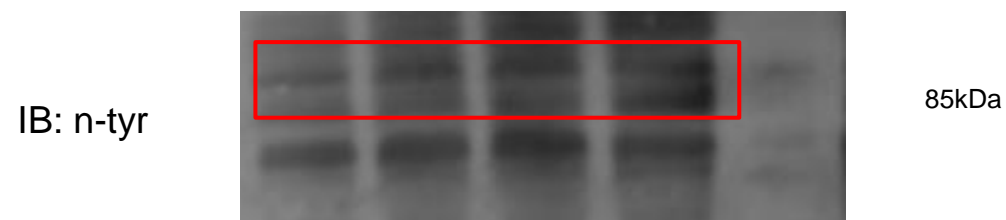

**Supplementary Figure S6:** Length gels relative to Fig 6A and B. Red boxes indicate the cropping lines used to generate the figures.

A.

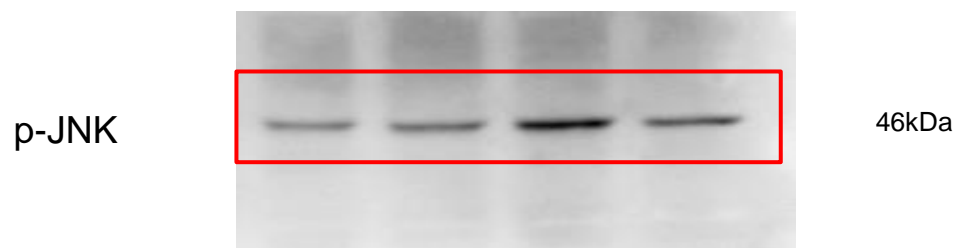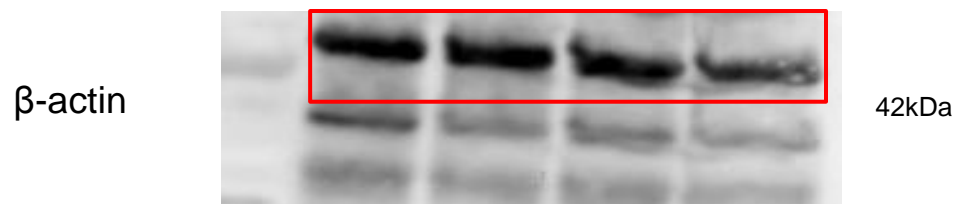

# Supplementary Figure S6

B.

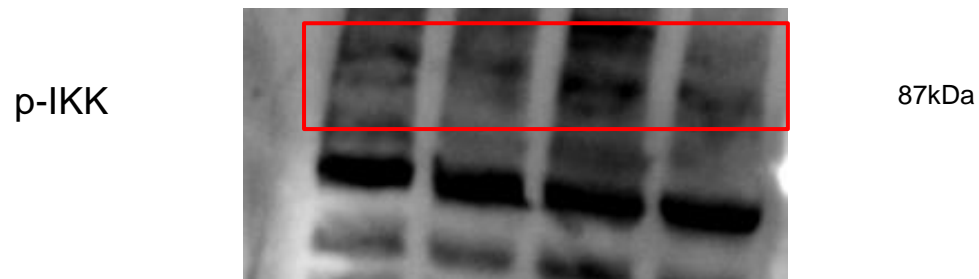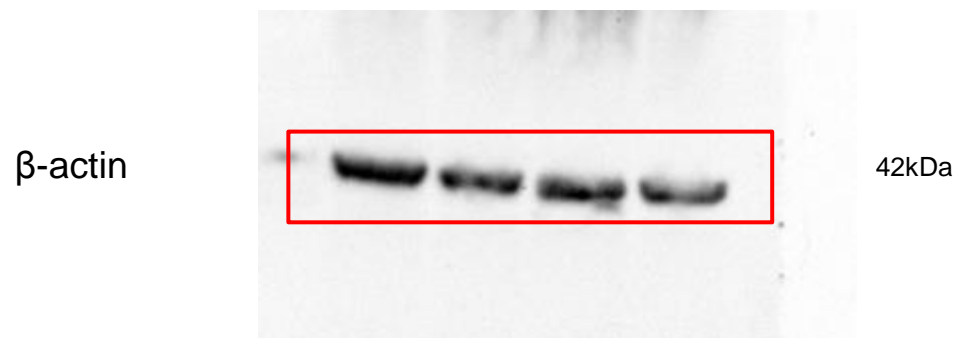

**Supplementary Figure S7:** Length gels relative to Fig 7A, B, C and D. Red boxes indicate the cropping lines used to generate the figures.

A.

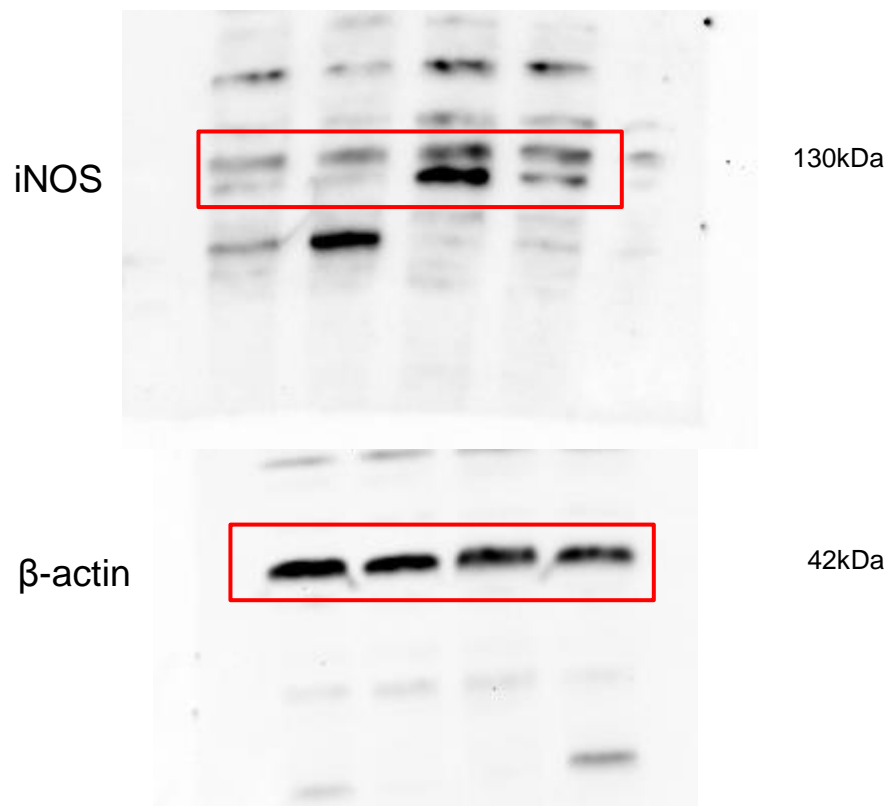

# Supplementary Figure S7

B.

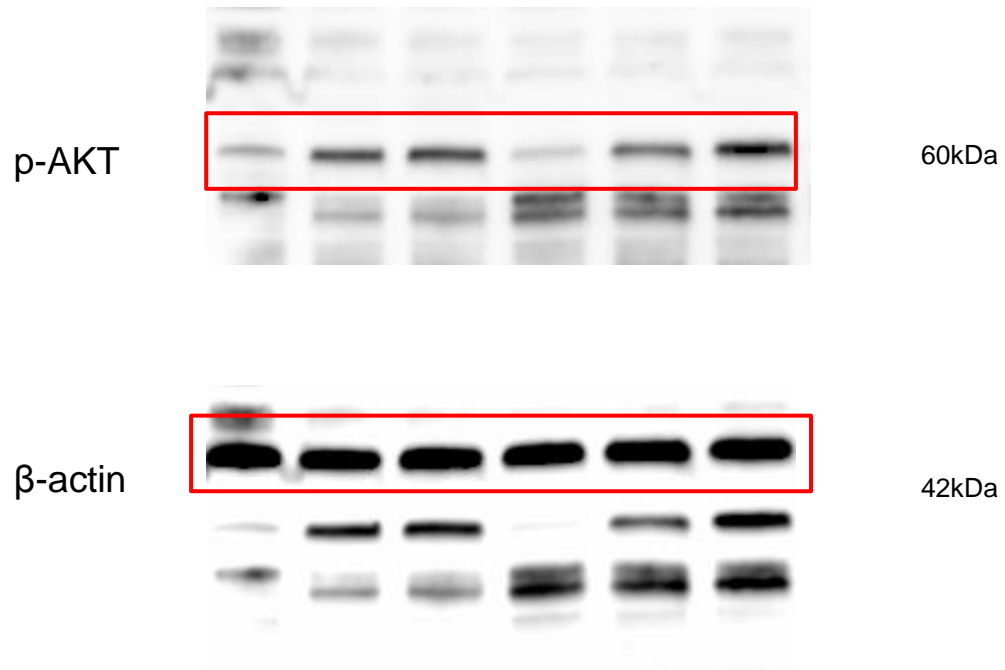

# Supplementary Figure S7

C.

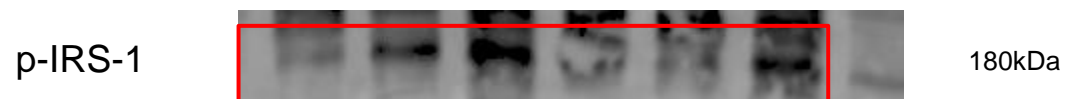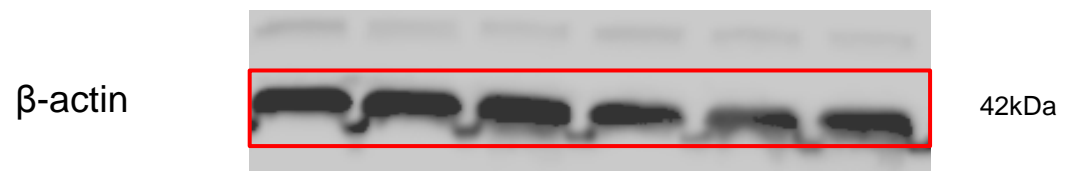



# Supplementary Figure S7

D.

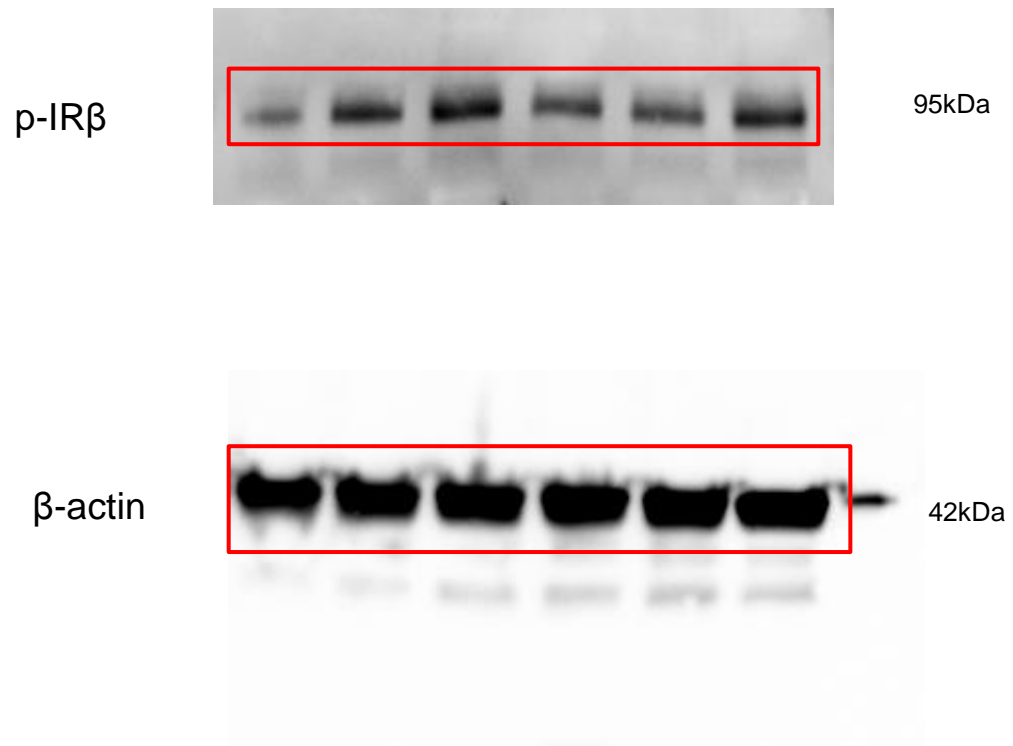

**Supplementary Figure S8:** Length gels relative to Fig 8A and B. Red boxes indicate the cropping lines used to generate the figures.

A.

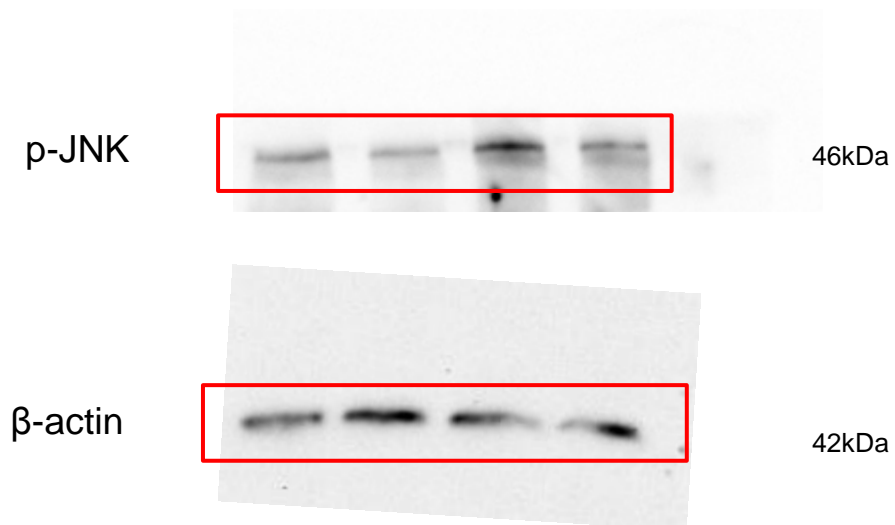

# Supplementary Figure S8

B.

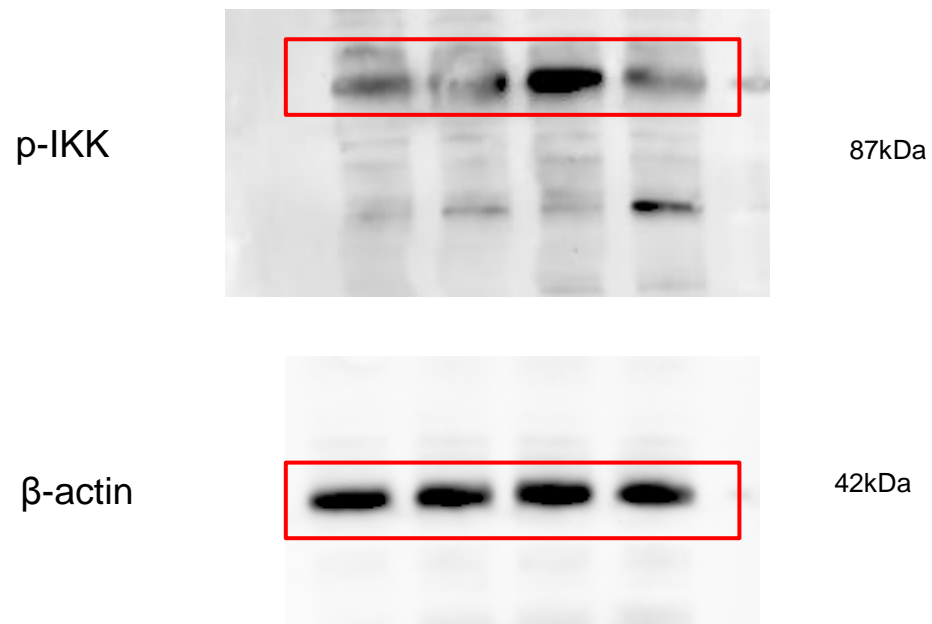

Supplement: 41598_2017_17558_MOESM1_ESM.pdf [file 41598_2017_17558_MOESM1_ESM.pdf]
